# Supplementary material
Source: PubMed Central journal article supplement (PMC6821960)
Supplement: AEM.01910-19-s0001.pdf [file AEM.01910-19-s0001.pdf]

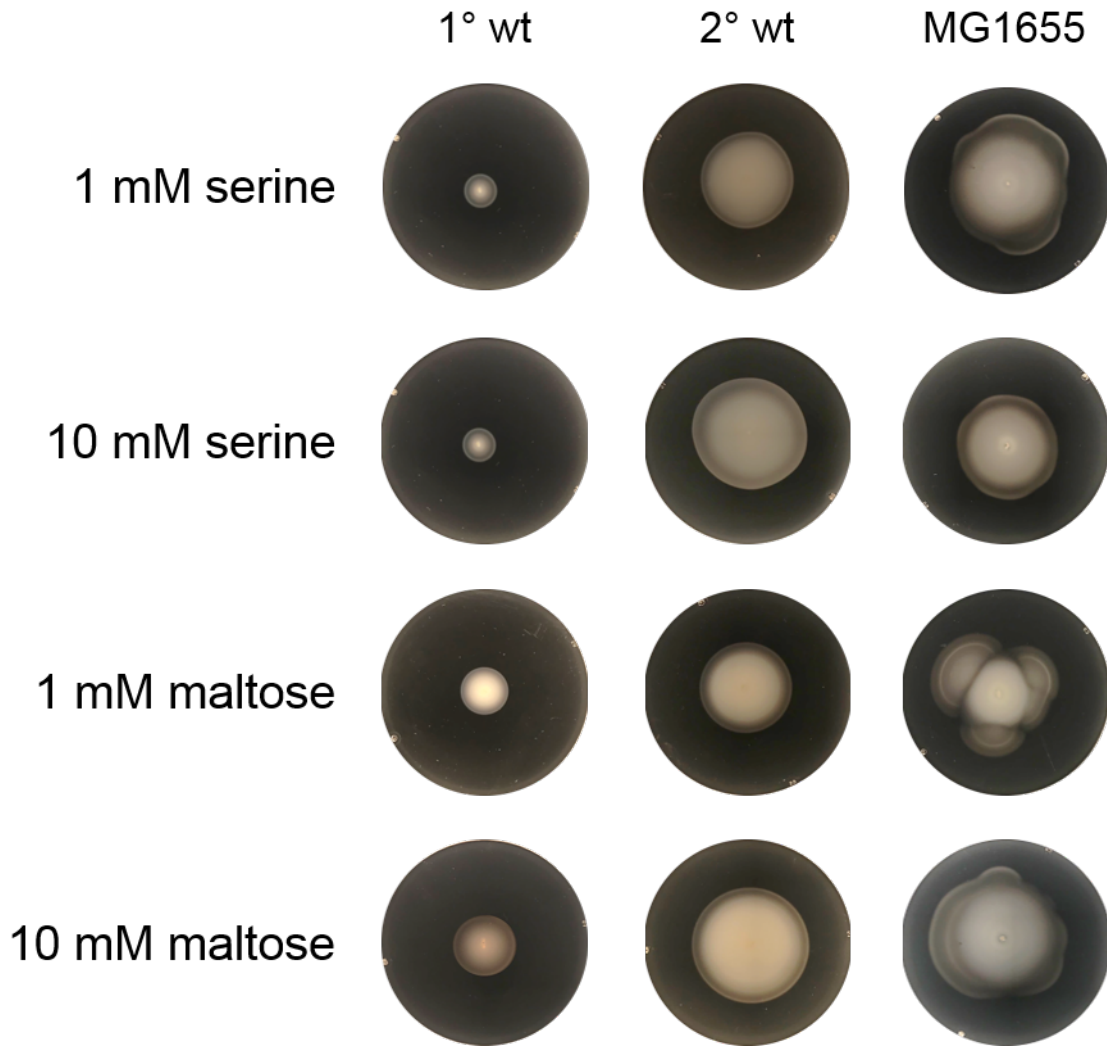

**Supplementary Figure S1 Soft agar plates of chemotaxis motility assay.** Compared to 1° cells, secondaries show increased motility in response to chemoattractants such as serine and maltose. *E. coli* MG1655 was used as positive control.

**Supplementary Table S1 List of all 638 genes differentially expressed in both *P. luminescens* DJC cells forms.** Genes are sorted accordingly to their functional subgroups. Fold changes are given as values of gene expression in 2° cells to 1° cells during exponential (Exp) and stationary growth phase (Stat) with filter criteria  $\leq -3$  or  $\geq 3$ ;  $p \leq 0.05$ . NS, not significant.

| Category and locus tag                       | Gene        | Protein(s) or similarity                                                                                                  | Protein accession number | Fold change ratio (2°wt/1°wt) |      |
|----------------------------------------------|-------------|---------------------------------------------------------------------------------------------------------------------------|--------------------------|-------------------------------|------|
|                                              |             |                                                                                                                           |                          | Exp                           | Stat |
| <b><u>Metabolism</u></b>                     |             |                                                                                                                           |                          |                               |      |
| <b>Hydroxyphenylacetate (HPA) metabolism</b> |             |                                                                                                                           |                          |                               |      |
| PluDJC_04995                                 | <i>hpaC</i> | 4-hydroxyphenylacetic acid hydroxylase                                                                                    | WP_011145337.1           | 6.04                          | NS   |
| PluDJC_05000                                 | <i>hpaB</i> | 4-hydroxyphenylacetate 3-monooxygenase, oxygenase component (4-HPA 3-monooxygenase large component) (4-HPA 3-hydroxylase) | WP_011145338.1           | 8.06                          | NS   |
| PluDJC_05035                                 | <i>hpaX</i> | 4-hydroxyphenylacetate permease                                                                                           | WP_011145344.1           | 5.99                          | NS   |
| PluDJC_05040                                 | <i>hpaI</i> | 2,4-dihydroxyhept-2-ene-1,7-dioic acid aldolase                                                                           | WP_011145345.1           | 6.21                          | NS   |
| PluDJC_05045                                 | <i>hpcG</i> | 2-oxo-hepta-3-ene-1,7-dioic acid hydratase                                                                                | WP_011145346.1           | 5.78                          | NS   |
| PluDJC_05050                                 | <i>gabD</i> | Succinate-semialdehyde dehydrogenase                                                                                      | WP_011145347.1           | 5.07                          | NS   |
| PluDJC_05055                                 |             | Similarities with probable MFS transporter                                                                                | WP_011145348.1           | 4.55                          | NS   |
| PluDJC_05060                                 | <i>hpcD</i> | 5-carboxymethyl-2-hydroxy-muconic acid isomerase                                                                          | WP_011145349.1           | 7.97                          | NS   |
| PluDJC_05065                                 | <i>hpcB</i> | 3,4-dihydroxyphenylacetate 2,3-dioxygenase                                                                                | WP_011145350.1           | 8.29                          | NS   |
| PluDJC_05070                                 | <i>hpcC</i> | 5-carboxymethyl-2-hydroxymuconate semialdehyde dehydrogenase                                                              | WP_011145351.1           | 7.18                          | NS   |

|              |              |                                            |                |      |    |
|--------------|--------------|--------------------------------------------|----------------|------|----|
| PluDJC_05075 | <i>hpaG2</i> | Probable 4-hydroxyphenylacetate catabolism | WP_011145352.1 | 7.85 | NS |
| PluDJC_05080 | <i>hpaG1</i> | Probable 4-hydroxyphenylacetate catabolism | WP_011145353.1 | 8.81 | NS |

### Arginine degradation and transport

|              |             |                                                              |                |       |       |
|--------------|-------------|--------------------------------------------------------------|----------------|-------|-------|
| PluDJC_15875 |             | Probable amino acid permease                                 | WP_011147321.1 | 18.35 | -5.37 |
| PluDJC_15880 | <i>astE</i> | Succinylglutamate desuccinylase                              | WP_011147322.1 | 20.28 | NS    |
| PluDJC_15885 | <i>astB</i> | Succinylarginine dihydrolase                                 | WP_011147323.1 | 16.26 | NS    |
| PluDJC_15890 | <i>astD</i> | Succinylglutamic semialdehyde dehydrogenase                  | WP_011147324.1 | 19.39 | NS    |
| PluDJC_15895 | <i>astA</i> | Arginine N-succinyltransferase (AOST)                        | WP_011147325.1 | 23.72 | NS    |
| PluDJC_15900 | <i>astC</i> | Succinylornithine transaminase (carbon starvation protein C) | WP_011147326.1 | 21.83 | NS    |
| PluDJC_17735 | <i>argO</i> | Arginine exporter ArgO                                       | WP_011147779.1 | NS    | -4.33 |

### Coenzyme B<sub>12</sub> biosynthesis

|              |             |                                         |                |       |        |
|--------------|-------------|-----------------------------------------|----------------|-------|--------|
| PluDJC_15270 | <i>cbiJ</i> | Precorrin-6X reductase                  | WP_011147209.1 | NS    | -6.78  |
| PluDJC_15275 | <i>cbiH</i> | Precorrin-3B C17-methyltransferase      | WP_011147210.1 | -4.94 | -7.89  |
| PluDJC_15280 | <i>cbiG</i> | Cobalamin biosynthesis protein G (CbiG) | WP_011147211.1 | -5.57 | -12.83 |
| PluDJC_15285 | <i>cbiF</i> | Precorrin-4 C11-methyltransferase       | WP_011147212.1 | -7.68 | -17.99 |
| PluDJC_15290 | <i>cbiT</i> | Precorrin-8W decarboxylase              | WP_011147213.1 | -9.10 | -42.31 |
| PluDJC_15295 | <i>cbiE</i> | Precorrin-6Y C5,15-methyltransferase    | WP_011147214.1 | -9.89 | NS     |

|              |             |                                                 |                |        |        |
|--------------|-------------|-------------------------------------------------|----------------|--------|--------|
| PluDJC_15300 | <i>cbiD</i> | Cobalamin biosynthesis protein CbiD             | WP_011147215.1 | -15.68 | -21.30 |
| PluDJC_15305 | <i>cbiC</i> | Precorrin-8X methylmutase (Precorrin isomerase) | WP_011147216.1 | -17.76 | -16.59 |
| PluDJC_15310 | <i>cbiB</i> | Cobalamin biosynthesis protein CbiB             | WP_011147217.1 | -29.78 | -16.67 |
| PluDJC_15315 | <i>cbiA</i> | Cobyric acid A,C-diamide synthase               | WP_011147218.1 | -32.74 | -54.19 |

### Other

|              |             |                                                                                                                                                |                |        |       |
|--------------|-------------|------------------------------------------------------------------------------------------------------------------------------------------------|----------------|--------|-------|
| PluDJC_00870 |             | Amidinotransferase                                                                                                                             | WP_011144560.1 | -19.65 | -9.86 |
| PluDJC_00385 | <i>acs</i>  | Acetyl-coenzyme A synthetase (acetate--COA ligase) (acyl-activating enzyme)                                                                    | WP_011144480.1 | 8.78   | NS    |
| PluDJC_01315 |             | Probable 4-hydroxyphenylacetic acid hydroxylase, Similar to 4-hydroxyphenylacetate 3-monooxygenase, oxygenase component HpaB                   | WP_011144645.1 | -3.48  | NS    |
| PluDJC_01335 |             | Similar to TRP-1 protein encoded by the <i>toxA</i> gene of <i>Burkholderia glumae</i> , methyltransferase involved in toxoflavin biosynthesis | WP_011144649.1 | -3.49  | -5.26 |
| PluDJC_01965 | <i>murQ</i> | N-acetylmuramic acid 6-phosphate etherase                                                                                                      | WP_011144789.1 | 3.74   | NS    |
| PluDJC_02315 |             | Aspartate aminotransferase family protein                                                                                                      | WP_041380544.1 | -6.86  | NS    |
| PluDJC_02320 |             | Zinc-binding dehydrogenase                                                                                                                     | WP_011144860.1 | -4.65  | NS    |
| PluDJC_02325 |             | HAD family phosphatase                                                                                                                         | WP_041379890.1 | -3.10  | NS    |
| PluDJC_02605 |             | Similar to probable acetyltransferase                                                                                                          | WP_082302960.1 | 4.58   | NS    |
| PluDJC_03125 | <i>ppdA</i> | Prepilin peptidase dependent protein A precursor                                                                                               | WP_011145002.1 | 14.12  | NS    |
| PluDJC_03130 | <i>ppdB</i> | Prepilin peptidase dependent protein B precursor                                                                                               | WP_011145003.1 | 4.54   | NS    |

|              |              |                                                                                                                      |                |        |       |
|--------------|--------------|----------------------------------------------------------------------------------------------------------------------|----------------|--------|-------|
| PluDJC_03240 |              | Serine protease                                                                                                      | WP_011145019.1 | 7.16   | NS    |
| PluDJC_03315 | <i>prtA</i>  | Alkaline metalloprotease precursor PrtA                                                                              | WP_011145031.1 | -8.47  | NS    |
| PluDJC_03320 | <i>inh</i>   | Proteinase inhibitor Inh precursor                                                                                   | WP_041380576.1 | -5.00  | NS    |
| PluDJC_03325 | <i>prtB</i>  | ATP-binding protein PrtB                                                                                             | WP_011145033.1 | -4.03  | NS    |
| PluDJC_03330 | <i>prtC</i>  | Membrane Fusion Protein PrtC                                                                                         | WP_011145034.1 | -5-39  | NS    |
| PluDJC_03895 |              | Acyl carrier protein                                                                                                 | WP_011145139.1 | 3.89   | NS    |
| PluDJC_04050 |              | HAD family hydrolase                                                                                                 | WP_011145169.1 | -4.77  | NS    |
| PluDJC_04055 |              | Phosphoribosyltransferase                                                                                            | WP_011145170.1 | -9.76  | NS    |
| PluDJC_04060 | <i>hisA2</i> | 1-(5-phosphoribosyl)-5-((5-phosphoribosylamino)methylideneamino)imidazole-4-carboxamide isomerase                    | WP_011145171.1 | -12.55 | NS    |
| PluDJC_04150 | <i>afuA</i>  | Periplasmic ferric iron-binding protein AfuA                                                                         | WP_041379924.1 | 4.61   | NS    |
| PluDJC_04785 |              | Inositol monophosphatase family protein                                                                              | WP_011145299.1 | 25.08  | NS    |
| PluDJC_04795 |              | Thymidylate kinase                                                                                                   | WP_041379942.1 | 23.69  | NS    |
| PluDJC_04810 | <i>mltD</i>  | Membrane-bound lytic murein transglycosylase D precursor (murein hydrolase D)                                        | WP_011145304.1 | NS     | -6.05 |
| PluDJC_05135 |              | Similar to salicylate-5-hydroxylase large oxygenase component                                                        | WP_011145363.1 | -3.88  | NS    |
| PluDJC_06375 | <i>nagE</i>  | PTS system, N-acetylglucosamine-specific IIABC component (EIIABC-NAG) (N-acetylglucosamine-permease IIABC component) | WP_011145641.1 | 5.14   | NS    |

|              |             |                                                                                   |                |        |       |
|--------------|-------------|-----------------------------------------------------------------------------------|----------------|--------|-------|
| PluDJC_07100 | <i>cydA</i> | Cytochrome D ubiquinol oxidase subunit I<br>(Cytochrome BD-I oxidase subunit I)   | WP_011145752.1 | NS     | 3.48  |
| PluDJC_07245 |             | ATP-binding cassette domain-containing protein                                    | WP_011145770.1 | 6.28   | NS    |
| PluDJC_07330 | <i>bioA</i> | Adenosylmethionine-8-amino-7-oxononanoate<br>transaminase (DAPA aminotransferase) | WP_011145786.1 | 3.14   | NS    |
| PluDJC_07330 | <i>cdd</i>  | Cytidine deaminase (Cytidine aminohydrolase)<br>(CDA)                             | WP_011145844.1 | NS     | 4.43  |
| PluDJC_07490 |             | Lipase family protein                                                             | WP_041380011.1 | NS     | -5.43 |
| PluDJC_07700 |             | Probable dehydrogenase                                                            | WP_011145860.1 | -7.94  | -8.19 |
| PluDJC_08350 | <i>pflA</i> | Pyruvate formate-lyase 1 activating enzyme (PFL-<br>activating enzyme)            | WP_011145904.1 | -7.19  | NS    |
| PluDJC_08355 | <i>pflB</i> | Formate acetyltransferase I (pyruvate formate-<br>lyase 1)                        | WP_011145905.1 | -12.50 | NS    |
| PluDJC_09075 |             | Similar to probable glycosyltransferase                                           | WP_011146040.1 | 4.57   | NS    |
| PluDJC_10180 | <i>xyfB</i> | Xylulose kinase                                                                   | WP_011146221.1 | -4.54  | NS    |
| PluDJC_10185 |             | Similar to xylitol (sorbitol) dehydrogenase                                       | WP_011146222.1 | -3.38  | -5.18 |
| PluDJC_10305 | <i>sgcA</i> | Putative phosphotransferase enzyme II, A<br>component SgcA                        | WP_011146240.1 | 3.87   | NS    |
| PluDJC_10310 | <i>sgaB</i> | Putative sugar phosphotransferase component II B                                  | WP_041380050.1 | 3.98   | NS    |
| PluDJC_10350 |             | Some similarities with unknown protein YhfS of<br>Escherichia coli                | WP_041380051.1 | 3.11   | 11.90 |
| PluDJC_10360 | <i>fruB</i> | Probable PTS system                                                               | WP_011146250.1 | 4.12   | 3.48  |

|              |             |                                                                                 |                |       |        |
|--------------|-------------|---------------------------------------------------------------------------------|----------------|-------|--------|
| PluDJC_10365 | <i>fruA</i> | Probable PTS sytem                                                              | WP_041380052.1 | NS    | 3.38   |
| PluDJC_11035 | <i>prsA</i> | Ribose-phosphate pyrophosphokinase<br>(Phosphoribosyl pyrophosphate synthetase) | WP_049789771.1 | NS    | -5.00  |
| PluDJC_11080 |             | Probable 3-oxoacyl-[acyl-carrier protein] reductase                             | WP_011146330.1 | NS    | -9.36  |
| PluDJC_11200 | <i>plIA</i> | Lectin A                                                                        | WP_011146351.1 | NS    | -12.22 |
| PluDJC_11225 | <i>cutC</i> | Copper homeostasis protein CutC                                                 | WP_011146355.1 | -3.12 | NS     |
| PluDJC_11530 |             | Alpha/beta hydrolase                                                            | WP_011146414.1 | NS    | -6.69  |
| PluDJC_11550 |             | Similar to 3-oxoacyl-[acyl-carrier-protein] synthase                            | WP_011146418.1 | -8.71 | -4.86  |
| PluDJC_11555 |             | Similar to acyl carrier protein (ACP)                                           | WP_011146419.1 | -7.56 | NS     |
| PluDJC_11685 |             | Some similarities with diaminobutyric acid<br>aminotransferase                  | WP_011146443.1 | 35.28 | NS     |
| PluDJC_11690 |             | Similar to hypothetical gamma-butyrobetaine,2-<br>oxoglutarate                  | WP_082303124.1 | 25.31 | NS     |
| PluDJC_11695 |             | Similar to acetyltransferase                                                    | WP_011146446.1 | 23.26 | NS     |
| PluDJC_11705 |             | Probable 2-oxopent-4-dienoate hydratase                                         | WP_011146453.1 | NS    | -12.09 |
| PluDJC_11710 |             | Similar to the 2-hydroxy-6-keonona-2,4-dienedoic<br>acid hydrolase              | WP_011146454.1 | -4.35 | -22.75 |
| PluDJC_11720 | <i>hcaE</i> | 3-phenylpropionate dioxygenase alpha subunit<br>(digoxigenin alpha subunit)     | WP_011146456.1 | NS    | -21.76 |
| PluDJC_11725 | <i>hcaF</i> | 3-phenylpropionate dioxygenase beta subunit<br>(digoxigenin beta subunit)       | WP_011146457.1 | -3.30 | -32.04 |

|              |             |                                                                                                                 |                |       |        |
|--------------|-------------|-----------------------------------------------------------------------------------------------------------------|----------------|-------|--------|
| PluDJC_11730 | <i>hcaC</i> | 3-phenylpropionate dioxygenase ferredoxin subunit (digoxigenin ferredoxin subunit)                              | WP_011146458.1 | NS    | -29.29 |
| PluDJC_11735 | <i>hcaB</i> | 2,3-dihydroxy-2,3-dihydrophenylpropionate dehydrogenase                                                         | WP_011146459.1 | NS    | -32.97 |
| PluDJC_11740 | <i>mhpB</i> | Similar to 2,3-dihydroxyphenylpropionate 1,2-dioxygenase                                                        | WP_011146460.1 | NS    | -33.64 |
| PluDJC_11745 | <i>hcaD</i> | Similar to 3-phenylpropionate dioxygenase ferredoxin-NAD(+) reductase component, putative secreted protein      | WP_011146461.1 | NS    | -25.21 |
| PluDJC_11845 | <i>bioD</i> | ATP-dependent dethiobiotin synthetase BioD                                                                      | WP_011146478.1 | -4.50 | -25.51 |
| PluDJC_12070 | <i>bglA</i> | 6-phospho-beta-glucosidase A                                                                                    | WP_011146522.1 | NS    | -10.08 |
| PluDJC_12090 |             | Glyoxalase                                                                                                      | WP_041380079.1 | 3.59  | NS     |
| PluDJC_12115 |             | Some similarities with entry exclusion protein 2 (Exc2)                                                         | WP_011146530.1 | 3.62  | NS     |
| PluDJC_12285 |             | Probable siderophore receptor, Similar to the pesticin receptor precursor FuyA                                  | WP_011146558.1 | -7.25 | NS     |
| PluDJC_12380 |             | Some similarities with acyl-CoA oxidase                                                                         | WP_011146572.1 | NS    | -13.15 |
| PluDJC_12405 |             | Some similarities with decarboxylase                                                                            | WP_041380082.1 | 10.44 | NS     |
| PluDJC_13360 | <i>xthA</i> | Exodeoxyribonuclease III (exonuclease III) (EXO III) (AP endonuclease VI)                                       | WP_011146772.1 | NS    | 5.13   |
| PluDJC_13795 | <i>aroH</i> | Phospho2-dehydro-3-deoxyheptonate aldolase, trp-sensitive (3-deoxy-D-arabinoheptulosonate 7-phosphate synthase) | WP_011146852.1 | -3.19 | NS     |
| PluDJC_14120 | <i>pip</i>  | Proline iminopeptidase (PIP)                                                                                    | WP_011146913.1 | 6.99  | NS     |



|              |             |                                                                                      |                |       |         |
|--------------|-------------|--------------------------------------------------------------------------------------|----------------|-------|---------|
| PluDJC_14145 | <i>sdaA</i> | L-serine dehydratase 1 (SDH 1)                                                       | WP_011146918.1 | -3.18 | NS      |
| PluDJC_14335 |             | Similar to peptide synthetases like lichenysin synthetase A or bacitracin synthetase | WP_011146954.1 | NS    | -5.28   |
| PluDJC_14730 | <i>pepT</i> | Peptidase T (aminotripeptidase) (tripeptidase)                                       | WP_011147030.1 | -4.94 | NS      |
| PluDJC_14760 |             | Similar to pyoverdine biosynthesis protein PvcA of <i>Pseudomonas aeruginosa</i>     | WP_011147036.1 | NS    | -58.09  |
| PluDJC_14765 |             | Similar to pyoverdine biosynthesis protein PvcB of <i>Pseudomonas aeruginosa</i>     | WP_011147037.1 | NS    | -297.45 |
| PluDJC_14790 | <i>ndh</i>  | NADH dehydrogenase                                                                   | WP_011147041.1 | -3.26 | NS      |
| PluDJC_14895 |             | NAD(P)-dependent oxidoreductase                                                      | WP_011147062.1 | 3.80  | NS      |
| PluDJC_15145 |             | Highly similar to the N-terminal region of siroheme synthase activity                | WP_011147184.1 | -5.55 | NS      |
| PluDJC_15150 |             | Similar to PduX protein                                                              | WP_041380147.1 | -9.55 | NS      |
| PluDJC_15155 | <i>cobD</i> | Aminotransferase                                                                     | WP_041380149.1 | -8.61 | -3.97   |
| PluDJC_15160 |             | Highly similar to the C-terminal region of siroheme synthase activity                | WP_041380961.1 | -7.93 | -6.32   |
| PluDJC_15170 | <i>eutB</i> | Ethanolamine ammonia-lyase heavy chain                                               | WP_011147189.1 | NS    | -4.49   |
| PluDJC_15175 | <i>eutC</i> | Ethanolamine ammonia-lyase light chain                                               | WP_011147190.1 | NS    | -4.98   |
| PluDJC_15410 |             | unknown, Similar to putative galactosyl transferase or beta-glucosyltransferase      | WP_011147235.1 | NS    | 26.38   |
| PluDJC_15530 |             | Dabb family protein                                                                  | WP_011147256.1 | -3.84 | NS      |

|              |             |                                                                                           |                |       |       |
|--------------|-------------|-------------------------------------------------------------------------------------------|----------------|-------|-------|
| PluDJC_15540 | <i>paaK</i> | Phenylacetate-coenzyme A ligase (Phenylacetyl-CoA ligase) (PA-CoA ligase)                 | WP_011147258.1 | -3.45 | NS    |
| PluDJC_15545 |             | Similar to branched-chain amino acid aminotransferase                                     | WP_011147259.1 | -3.27 | NS    |
| PluDJC_15550 |             | Some similarities with prephenate dehydratase                                             | WP_011147260.1 | -3.49 | NS    |
| PluDJC_15555 |             | Carboxymuconolactone decarboxylase family protein                                         | WP_011147261.1 | -3.05 | NS    |
| PluDJC_15560 |             | Similar to ornithine cyclodeaminase                                                       | WP_011147262.1 | -3.16 | NS    |
| PluDJC_15695 | <i>menE</i> | O-succinylbenzoic acid--CoA ligase (OSB-CoA synthetase) (O-succinylbenzoate-CoA synthase) | WP_011147286.1 | -3.58 | NS    |
| PluDJC_15705 | <i>menB</i> | naphthoate synthase (dihydroxynaphthoic acid synthetase) (DHNA synthetase)                | WP_011147288.1 | -3.53 | NS    |
| PluDJC_15710 |             | Similar to putative enzyme YfbB of Escherichia coli                                       | WP_011147289.1 | -9.86 | NS    |
| PluDJC_15715 | <i>menD</i> | menaquinone biosynthesis protein menD                                                     | WP_011147290.1 | -7.50 | -4.04 |
| PluDJC_15825 | <i>ackA</i> | Acetate kinase (acetokinase)                                                              | WP_011147312.1 | -6.63 | NS    |
| PluDJC_15830 | <i>pta</i>  | Phosphate acetyltransferase (phosphotransacetylase)                                       | WP_071824169.1 | -5.09 | NS    |
| PluDJC_15865 |             | Similar to cysteine desulfurase (NifS protein homolog)                                    | WP_041380178.1 | 3.17  | NS    |
| PluDJC_16320 | <i>hutH</i> | Histidine ammonia-lyase (histidase)                                                       | WP_011147399.1 | 8.31  | NS    |
| PluDJC_16325 | <i>hutU</i> | Urocanate hydratase (urocanase) (imidazolonepropionate hydrolase)                         | WP_011147400.1 | 8.82  | NS    |
| PluDJC_17465 | <i>prpD</i> | 2-methylcitrate dehydratase                                                               | WP_011147720.1 | 3.17  | NS    |

|              |             |                                                                                                     |                |       |      |
|--------------|-------------|-----------------------------------------------------------------------------------------------------|----------------|-------|------|
| PluDJC_17470 | <i>prpC</i> | 2-methylcitrate synthase (Methylcitrate synthase) (Citrate synthase 2)                              | WP_011147721.1 | 5.46  | NS   |
| PluDJC_17475 | <i>prpB</i> | Probable methylisocitrate lyase (2-methylisocitrate lyase)                                          | WP_011147722.1 | 7.15  | NS   |
| PluDJC_17585 |             | Similar to p-aminobenzoic acid synthase                                                             | WP_011147742.1 | -4.60 | NS   |
| PluDJC_17590 |             | Similar to PapB protein and to chorismate mutase/prephenate dehydrogenase                           | WP_011147743.1 | -4.18 | NS   |
| PluDJC_17595 |             | Similar to class II aminotransferase and 5-aminolevulinic acid synthase                             | WP_011147744.1 | -4.94 | NS   |
| PluDJC_17600 |             | Similar to putative methylase and with protoporphyrinogen oxidase                                   | WP_011147745.1 | -3.97 | NS   |
| PluDJC_17605 |             | Similar to N-formimidoyl fortimicin A synthase                                                      | WP_011147746.1 | -4.25 | NS   |
| PluDJC_17655 |             | Some similarities with hemagglutinin/hemolysin-related protein.                                     | WP_011147762.1 | 6.04  | NS   |
| PluDJC_17660 | <i>gcvP</i> | glycine dehydrogenase [decarboxylating] (glycine decarboxylase) (glycine cleavage system P-protein) | WP_011147763.1 | 4.46  | NS   |
| PluDJC_17670 | <i>gcvT</i> | Aminomethyltransferase (glycine cleavage system T protein)                                          | WP_011147765.1 | 3.04  | NS   |
| PluDJC_17715 | <i>rpiA</i> | Ribose 5-phosphate isomerase A (phosphoriboisomerase A)                                             | WP_011147773.1 | NS    | 5.23 |
| PluDJC_17800 | <i>pdhR</i> | Pyruvate dehydrogenase complex repressor                                                            | WP_011147791.1 | -4.23 | NS   |
| PluDJC_18080 | <i>speA</i> | Biosynthetic arginine decarboxylase (ADC)                                                           | WP_011147844.1 | -3.59 | NS   |
| PluDJC_18090 | <i>sprT</i> | Protein SprT                                                                                        | WP_011147847.1 | -3.33 | NS   |

|              |             |                                                                   |                |        |       |
|--------------|-------------|-------------------------------------------------------------------|----------------|--------|-------|
| PluDJC_18115 |             | Some similarities with DNA primase.                               | WP_011145462.1 | NS     | -5.03 |
| PluDJC_18390 | <i>abgT</i> | Aminobenzoyl-glutamate transport protein                          | WP_011147866.1 | 7.11   | NS    |
| PluDJC_18395 | <i>abgB</i> | Aminobenzoyl-glutamate utilization protein B                      | WP_011147867.1 | 6.15   | NS    |
| PluDJC_18400 | <i>abgA</i> | Aminobenzoyl-glutamate utilization protein A                      | WP_011147868.1 | 6.70   | NS    |
| PluDJC_18420 |             | Similar to aminotransferases                                      | WP_011147872.1 | 5.18   | NS    |
| PluDJC_18485 | <i>wzc</i>  | Tyrosine-protein kinase Wzc                                       | WP_011147884.1 | -9.39  | NS    |
| PluDJC_18490 | <i>wzb</i>  | Low molecular weight protein-tyrosine-phosphatase Wzb             | WP_011147885.1 | -8.00  | NS    |
| PluDJC_18810 | <i>ppiB</i> | Peptidyl-prolyl cis-trans isomerase B (PPIase B) (rotamase B)     | WP_011147946.1 | NS     | -4.39 |
| PluDJC_19340 | <i>ggt</i>  | Gamma-glutamyltranspeptidase                                      | WP_011148043.1 | 6.46   | NS    |
| PluDJC_19410 |             | Some similarities with polyketide synthase and peptide synthetase | WP_011148054.1 | NS     | -6.63 |
| PluDJC_19615 | <i>ribB</i> | 3,4-dihydroxy-2-butanone 4-phosphate synthase (DHBP synthase)     | WP_011148096.1 | 3.42   | NS    |
| PluDJC_20395 | <i>genX</i> | Putative lysyl-tRNA synthetase (Lysine-tRNA ligase)               | WP_011148239.1 | 4.46   | -4.74 |
| PluDJC_20195 |             | Isocitrate/isopropylmalate dehydrogenase family protein           | WP_011148202.1 | 30.71  | NS    |
| PluDJC_20200 |             | Alpha/beta hydrolase                                              | WP_011148203.1 | 48.49  | NS    |
| PluDJC_20205 |             | 3-hydroxy-3-methylglutaryl-CoA lyase                              | WP_011148204.1 | 43.31  | NS    |
| PluDJC_20370 |             | Sel1 repeat family protein                                        | WP_011148234.1 | -10.72 | NS    |

|              |                  |                                                                                                       |                |        |         |
|--------------|------------------|-------------------------------------------------------------------------------------------------------|----------------|--------|---------|
| PluDJC_20410 | <i>frdA</i>      | Fumarate reductase flavoprotein subunit                                                               | WP_011148241.1 | -4.94  | -11.96  |
| PluDJC_20415 | <i>frdB</i>      | Fumarate reductase iron-sulfur protein                                                                | WP_011148242.1 | NS     | -21.02  |
| PluDJC_20420 | <i>frdC</i>      | Fumarate reductase 15 kDa hydrophobic protein                                                         | WP_011148243.1 | NS     | -14.13  |
| PluDJC_20425 | <i>frdD</i>      | Fumarate reductase 13 kDa hydrophobic protein                                                         | WP_011148244.1 | NS     | -7.97   |
| PluDJC_20545 |                  | Similar to unknown protein and to dihydrodipicolinate reductase                                       | WP_011148266.1 | NS     | -9.74   |
| PluDJC_20640 |                  | GNAT family N-acetyltransferase                                                                       | WP_011148282.1 | -15.08 | NS      |
| PluDJC_20645 |                  | Similar to the phenylacetyl-CoA ligase (in the phenylacetic acid catabolic pathway)                   | WP_011148283.1 | -21.24 | NS      |
| PluDJC_20650 |                  | Some similarities with fatty-acyl-CoA reductase                                                       | WP_011148284.1 | -25.93 | NS      |
| PluDJC_20655 |                  | Acyl-protein synthase                                                                                 | WP_011148285.1 | -48.11 | -5.67   |
| PluDJC_20965 | <i>lecB-like</i> | Fucose-binding lectin II                                                                              | WP_011148336.1 | NS     | -108.18 |
| PluDJC_20980 | <i>ppxB</i>      | Photopexin B                                                                                          | WP_011148341.1 | 3.08   | NS      |
| PluDJC_21215 | <i>iunH</i>      | Inosine-uridine preferring nucleoside hydrolase (IU-nucleoside hydrolase) (purine nucleosidase)       | WP_011148384.1 | 4.88   | NS      |
| PluDJC_21220 |                  | Similar to glycosyltransferase                                                                        | WP_011148385.1 | NS     | -5.98   |
| PluDJC_21285 | <i>pcp</i>       | Pyrrolidone-carboxylate peptidase (5-oxopropyl-peptidase) (Pyroglutamyl-peptidase I) (PGP-I) (Pyrase) | WP_011148398.1 | NS     | -25.28  |
| PluDJC_21290 | <i>pcxpA</i>     | LamB/YcsF family protein                                                                              | WP_041380395.1 | NS     | -10.98  |
| PluDJC_21295 |                  | 5-oxoprolinase/urea amidolyase family protein                                                         | WP_011148400.1 | NS     | -10.18  |
| PluDJC_21305 | <i>rtcB</i>      | Protein RtcB                                                                                          | WP_041381186.1 | NS     | -6.42   |

|              |             |                                                                                                                                   |                |       |        |
|--------------|-------------|-----------------------------------------------------------------------------------------------------------------------------------|----------------|-------|--------|
| PluDJC_21310 |             | Nucleotidyltransferase domain-containing protein                                                                                  | WP_011148403.1 | NS    | -9.58  |
| PluDJC_21450 |             | Some similarities with dioxygenase                                                                                                | WP_082303140.1 | -3.11 | -4.64  |
| PluDJC_21515 | <i>uvrA</i> | Exconuclease ABC subunit A                                                                                                        | WP_011148440.1 | NS    | 3.69   |
| PluDJC_22270 | <i>nrdD</i> | Anaerobic ribonucleoside-triphosphate reductase                                                                                   | WP_011148579.1 | -4.95 | NS     |
| PluDJC_22275 | <i>nrdG</i> | Anaerobic ribonucleoside-triphosphate reductase activating protein (class III anaerobic ribonucleotide reductase small component) | WP_011148580.1 | -5.60 | NS     |
| PluDJC_22305 |             | Prenyltransferase                                                                                                                 | WP_041380416.1 | -3.53 | NS     |
| PluDJC_22310 |             | Some similarities with 3-hydroxy-3-methylglutaryl coenzyme A reductase                                                            | WP_011148587.1 | -9.05 | NS     |
| PluDJC_22315 |             | Similar to phosphoenolpyruvate synthase                                                                                           | WP_049789807.1 | -5.70 | NS     |
| PluDJC_22380 | <i>deaD</i> | Inducible ATP-independent RNA helicase                                                                                            | WP_011148599.1 | -3.79 | NS     |
| PluDJC_23160 | <i>ilvC</i> | Ketol-acid reductoisomerase                                                                                                       | WP_011148738.1 | -5.93 | NS     |
| PluDJC_23375 | <i>rpsK</i> | 30S ribosomal protein S11                                                                                                         | WP_002919257.1 | NS    | -4.12  |
| PluDJC_23405 | <i>rpsE</i> | 30S ribosomal protein S5                                                                                                          | WP_011148778.1 | NS    | -3.52  |
| PluDJC_24320 |             | Class I SAM-dependent methyltransferase                                                                                           | WP_041380442.1 | -3.83 | NS     |
| PluDJC_24355 | <i>ppyS</i> | Photopyrone synthase                                                                                                              | WP_041380444.1 | NS    | -16.83 |
| PluDJC_24550 |             | Similar to macrolide-efflux protein                                                                                               | WP_011148938.1 | -4.85 | NS     |
| PluDJC_24555 |             | Similar to sugar kinase                                                                                                           | WP_011148939.1 | -4.26 | NS     |

### **Phage related**

|              |                                                                   |                |      |        |
|--------------|-------------------------------------------------------------------|----------------|------|--------|
| PluDJC_00055 | Probable tail synthesis                                           | WP_011144422.1 | NS   | -5.75  |
| PluDJC_00060 | Probable tail synthesis                                           | WP_011144423.1 | NS   | -24.74 |
| PluDJC_00065 | Probable essential tail protein; putative tail length determinant | WP_011144424.1 | NS   | -17.45 |
| PluDJC_00070 | Probable tail synthesis                                           | WP_071824073.1 | NS   | -22.74 |
| PluDJC_00075 | Probable tail synthesis                                           | WP_011144426.1 | NS   | -32.29 |
| PluDJC_00080 | Probable tail tube structure                                      | WP_011144427.1 | NS   | -28.22 |
| PluDJC_00085 | Probable tail sheath structure                                    | WP_011144428.1 | NS   | -33.96 |
| PluDJC_00110 | Probable tail fiber synthesis                                     | WP_011144432.1 | NS   | -10.38 |
| PluDJC_00115 | Probable tail fiber synthesis                                     | WP_011144433.1 | NS   | -20.69 |
| PluDJC_00120 | Probable tail fiber synthesis                                     | WP_011144434.1 | NS   | -17.79 |
| PluDJC_00125 | Probable tail baseplate synthesis                                 | WP_011144435.1 | NS   | -27.17 |
| PluDJC_00130 | Probable tail baseplate synthesis                                 | WP_011144436.1 | NS   | -17.80 |
| PluDJC_00135 | Probable tail baseplate synthesis                                 | WP_011144437.1 | NS   | -20.68 |
| PluDJC_00140 | Probable tail baseplate synthesis                                 | WP_011144438.1 | NS   | -23.18 |
| PluDJC_00145 | Probable tail synthesis                                           | WP_011144439.1 | NS   | -14.75 |
| PluDJC_00170 | Putative tail fiber synthesis                                     | WP_041379846.1 | NS   | -14.76 |
| PluDJC_00175 | Putative tail fiber synthesis                                     | WP_049789712.1 | NS   | -19.72 |
| PluDJC_01385 | Phage integrase family                                            | WP_011144659.1 | 7.46 | NS     |
| PluDJC_02265 | Some similarities with gp31 protein of bacteriophage              | WP_011144849.1 | NS   | 10.49  |

|              |                                                                |                |      |       |
|--------------|----------------------------------------------------------------|----------------|------|-------|
| PluDJC_02270 | Some similarities with gp31 protein of bacteriophage           | WP_011144850.1 | NS   | 11.21 |
| PluDJC_02275 | Some similarities with gp31 protein of bacteriophage           | WP_041379889.1 | NS   | 6.08  |
| PluDJC_02280 | Some similarities with gp31 protein of bacteriophage           | WP_011144852.1 | NS   | 6.15  |
| PluDJC_04185 | Some similarities with gp31/30 protein of bacteriophage        | WP_011145192.1 | NS   | 5.06  |
| PluDJC_04190 | Some similarities with gp31/30 protein of bacteriophage        | WP_011145193.1 | NS   | 12.69 |
| PluDJC_04195 | Some similarities with gp31/30 protein of bacteriophage        | WP_011145194.1 | NS   | 19.59 |
| PluDJC_04220 | Some similarities with gp31 protein of bacteriophage           | WP_041379929.1 | NS   | 8.33  |
| PluDJC_04225 | Some similarities with gp31 protein of bacteriophage           | WP_011145197.1 | NS   | 6.17  |
| PluDJC_04230 | Some similarities with gp31 protein of bacteriophage           | WP_011145198.1 | NS   | 8.94  |
| PluDJC_07380 | Some similarities with gp30 protein of Bacteriophage           | WP_011145795.1 | 3.22 | 8.88  |
| PluDJC_10545 | Similar to putative tail fiber protein                         | WP_011146278.1 | NS   | -6.28 |
| PluDJC_10860 | Some similarities with DNA inversion product                   | WP_011146290.1 | NS   | -7.84 |
| PluDJC_10865 | Some similarities with putative tail fiber protein of prophage | WP_011146291.1 | NS   | -6.84 |



|              |                                                                             |                |       |        |
|--------------|-----------------------------------------------------------------------------|----------------|-------|--------|
| PluDJC_10945 | Some similarities with unknown protein from a prophage                      | WP_011146304.1 | NS    | -5.13  |
| PluDJC_12220 | Probable bacteriophage protein                                              | WP_011146551.1 | -3.19 | NS     |
| PluDJC_12290 | Similar to putative transmembrane protein and signal transducers like Irp8. | WP_011146559.1 | -3.36 | NS     |
| PluDJC_15090 | Probable bacteriophage protein                                              | CAE15331.1     | -3.96 | NS     |
| PluDJC_15100 | Some similarities with bacteriophage protein                                | WP_011147178.1 | NS    | -17.37 |
| PluDJC_15105 | Similar to bacteriophage tail fiber protein                                 | WP_011147180.1 | -3.46 | NS     |
| PluDJC_15110 | Similar to bacteriophage tail fiber protein                                 | WP_011147181.1 | -3.27 | NS     |
| PluDJC_15395 | Similar to putative phage protein                                           | WP_011147238.1 | NS    | 4.97   |
| PluDJC_15440 | Some similarities with putative tail fiber protein                          | WP_011147239.1 | NS    | 11.92  |
| PluDJC_15445 | Similar to putative phage protein                                           | WP_011147240.1 | NS    | 22.37  |
| PluDJC_15450 | Similar to putative tail fiber protein from a lambdoid prophage             | WP_011147241.1 | NS    | 14.83  |
| PluDJC_15455 | Similar to Sc/SvQ protein of Escherichia coli plasmid p15B                  | WP_011147242.1 | NS    | 21.09  |
| PluDJC_15460 | Probable phage protein                                                      | WP_011147243.1 | NS    | 33.08  |
| PluDJC_15465 | Probable phage protein                                                      | WP_011147244.1 | NS    | 15.38  |
| PluDJC_15470 | Probable phage protein                                                      | WP_011147245.1 | NS    | 27.52  |
| PluDJC_15475 | Probable phage protein                                                      | WP_011147246.1 | NS    | 22.90  |
| PluDJC_15480 | Probable phage protein                                                      | WP_011147247.1 | NS    | 31.28  |

|              |                                                                               |                |       |       |
|--------------|-------------------------------------------------------------------------------|----------------|-------|-------|
| PluDJC_15485 | Probable phage protein                                                        | WP_011147248.1 | NS    | 33.40 |
| PluDJC_15490 | Probable phage protein                                                        | WP_011147249.1 | NS    | 21.03 |
| PluDJC_15495 | Probable phage protein                                                        | WP_011147250.1 | NS    | 20.87 |
| PluDJC_15500 | Probable phage protein                                                        | WP_011147251.1 | NS    | 23.09 |
| PluDJC_15505 | Probable phage protein                                                        | WP_011147252.1 | NS    | 10.55 |
| PluDJC_15510 | Probable phage protein                                                        | WP_011147253.1 | NS    | 14.07 |
| PluDJC_15515 | Probable phage protein                                                        | WP_011147254.1 | NS    | 16.87 |
| PluDJC_15520 | Probable phage protein                                                        | WP_011147255.1 | 5.18  | 10.97 |
| PluDJC_18800 | Some similarities with prophage tail fiber protein                            | WP_011147944.1 | NS    | -3.66 |
| PluDJC_21620 | Similar to bacteriophage tail fiber assembly protein                          | WP_041380400.1 | -5.30 | NS    |
| PluDJC_21625 | Some similarities with the N-terminal region of unknown bacteriophage protein | WP_011148460.1 | -5.66 | NS    |

### **Membrane proteins**

|              |                                                                                                                 |                |      |      |
|--------------|-----------------------------------------------------------------------------------------------------------------|----------------|------|------|
| PluDJC_00380 | Highly similar to putative membrane protein Yjch of Escherichia coli                                            | WP_011144479.1 | 5.74 | NS   |
| PluDJC_09035 | Probable porin                                                                                                  | WP_011146031.1 | 3.57 | NS   |
| PluDJC_10015 | Hypothetical transmembrane protein                                                                              | WP_011146190.1 | 4.34 | NS   |
| PluDJC_10245 | Similar to putative PagC-like membrane protein (virulence-related membrane protein) of Escherichia coli O157:H7 | WP_011146228.1 | NS   | 9.56 |

|              |                                                                           |                |        |        |
|--------------|---------------------------------------------------------------------------|----------------|--------|--------|
| PluDJC_11335 | Some similarities with probable membrane protein YdgF of Escherichia coli | WP_011146377.1 | NS     | 16.37  |
| PluDJC_11545 | Hypothetical transmembrane protein                                        | WP_011146417.1 | -9.96  | NS     |
| PluDJC_13455 | Hypothetical protein with candidate membrane-spanning segments            | WP_011146792.1 | 4.28   | 9.43   |
| PluDJC_13830 | Hypothetical transmembrane protein                                        | WP_011146859.1 | -4.37  | NS     |
| PluDJC_15125 | Some similarities to membrane protein                                     | WP_011147182.1 | NS     | 19.56  |
| PluDJC_15415 | Some similarities with probable membrane protein YbiP of Escherichia coli | CAE15391.1     | NS     | 22.99  |
| PluDJC_21275 | Similar to putative membrane protein                                      | WP_011148396.1 | NS     | -10.30 |
| PluDJC_22250 | Putative transmembrane protein                                            | WP_041380415.1 | -25.64 | NS     |

### Transporter

|              |                                      |                                  |                |        |       |
|--------------|--------------------------------------|----------------------------------|----------------|--------|-------|
| PluDJC_00375 | Probable permease                    | WP_011144478.1                   | 5.71           | NS     |       |
| PluDJC_00945 | Probable dicarboxylate transporter   | WP_011144574.1                   | 6.38           | NS     |       |
| PluDJC_00950 |                                      | WP_011144575.1                   | 6.05           | NS     |       |
| PluDJC_00955 |                                      | WP_011144576.1                   | 3.51           | NS     |       |
| PluDJC_01120 | <i>feoB</i>                          | Ferrous iron transport protein B | WP_011144608.1 | 4.47   | NS    |
| PluDJC_01125 | <i>feoA</i>                          | Ferrous iron transport protein A | WP_011144609.1 | 4.86   | 11.91 |
| PluDJC_01580 | EamA-like transporter family protein | WP_011144696.1                   | NS             | -10.46 |       |
| PluDJC_02330 | MFS transporter                      | WP_011144862.1                   | -3.12          | NS     |       |

|              |             |                                                                                     |                |       |        |
|--------------|-------------|-------------------------------------------------------------------------------------|----------------|-------|--------|
| PluDJC_02935 | <i>nhaA</i> | Na(+)/H(+) antiporter 1 (sodium/proton antiporter 1)                                | WP_011144966.1 | NS    | 4.54   |
| PluDJC_03195 |             | Lipid A ABC transporter ATP-binding protein/permease MsbA                           | WP_041379908.1 | 15.46 | NS     |
| PluDJC_04800 |             | MFS transporter                                                                     | WP_011145302.1 | 16.36 | NS     |
| PluDJC_06170 | <i>proW</i> | Glycine betaine/L-proline ABC transporter, permease                                 | WP_011145606.1 | NS    | 4.69   |
| PluDJC_06175 | <i>proV</i> | Glycine betaine/L-proline ABC transporter, ATP-binding component                    | WP_011145607.1 | NS    | 3.96   |
| PluDJC_08360 | <i>focA</i> | Formate transporter 1 FocA (Formate channel 1)                                      | WP_011145906.1 | NS    | -10.14 |
| PluDJC_10255 | <i>dsdX</i> | Probable D-serine permease                                                          | WP_011146230.1 | NS    | -9.64  |
| PluDJC_10855 | <i>aqpZ</i> | Transmembrane water channel, aquaporin Z                                            | WP_011146289.1 | -3.30 | NS     |
| PluDJC_11703 |             | Probable transporter                                                                | WP_082303125.1 | NS    | -11.39 |
| PluDJC_11750 |             | Probable transporter, Highly similar to oligopeptide-binding protein precursor OppA | WP_011146463.1 | NS    | -11.68 |
| PluDJC_12400 |             | Highly similar to tyrosine-specific transport system TyrP of Escherichia coli       | WP_011146576.1 | 8.80  | NS     |
| PluDJC_12450 |             | Probable transporter, Similar to oligopeptide-binding protein precursor             | WP_011146586.1 | -7.90 | NS     |
| PluDJC_13080 | <i>oppF</i> | Oligopeptide ABC transporter                                                        | WP_011146712.1 | 5.50  | NS     |
| PluDJC_13085 | <i>oppD</i> |                                                                                     | WP_011146713.1 | 5.95  | NS     |
| PluDJC_13090 | <i>oppC</i> |                                                                                     | WP_011146714.1 | 5.86  | NS     |

|              |              |                                                                                            |                |       |       |
|--------------|--------------|--------------------------------------------------------------------------------------------|----------------|-------|-------|
| PluDJC_13095 | <i>oppB</i>  |                                                                                            | WP_011146715.1 | 7.05  | NS    |
| PluDJC_13100 | <i>oppA2</i> | Periplasmic-binding protein precursor OppA2                                                | WP_011146716.1 | 7.96  | NS    |
| PluDJC_13105 | <i>oppA1</i> | Periplasmic-binding protein precursor OppA1                                                | WP_011146717.1 | 3.46  | NS    |
| PluDJC_16265 | <i>tctC</i>  | Probable tricarboxylic tansporte                                                           | WP_011147388.1 | 4.27  | NS    |
| PluDJC_16315 |              | Highly similar to amino acid permease (proline-specific permease ProY of Escherichia coli) | WP_011147398.1 | 7.56  | NS    |
| PluDJC_18425 |              | Probable Na <sup>+</sup> /H <sup>+</sup> antiporter                                        | WP_011147873.1 | 5.44  | NS    |
| PluDJC_18445 |              | Probable magnesium transporter                                                             | WP_011147877.1 | 3.63  | NS    |
| PluDJC_18470 |              | Probable amino acid transporter                                                            | WP_011147881.1 | 11.11 | NS    |
| PluDJC_18495 |              | Probable polysaccharide transporter                                                        | WP_011147886.1 | -5.05 | -4.50 |
| PluDJC_18795 |              | AEC family transporter                                                                     | WP_011147943.1 | 6.71  | NS    |
| PluDJC_19770 | <i>sstT</i>  | Serine/threonine transporter SstT                                                          | WP_011148123.1 | 6.11  | NS    |
| PluDJC_21145 |              | APC family permease                                                                        | WP_011148370.1 | NS    | 11.02 |
| PluDJC_21925 |              | Probable transporter                                                                       | WP_011148514.1 | -5.91 | NS    |
| PluDJC_22355 |              | Probable ABC transporter                                                                   | WP_011148595.1 | 15.46 | NS    |

### **Virulence factors**

#### **Toxins**

|              |              |                                                            |                |      |    |
|--------------|--------------|------------------------------------------------------------|----------------|------|----|
| PluDJC_04120 | <i>tccB3</i> | unknown, probable Insecticidal toxin complex protein TccB3 | WP_011145180.1 | 3.47 | NS |
|--------------|--------------|------------------------------------------------------------|----------------|------|----|

|                   |             |                                                                                           |                |        |        |
|-------------------|-------------|-------------------------------------------------------------------------------------------|----------------|--------|--------|
| PluDJC_10985      |             | Probable toxin, Some similarities with putative adhesin, invasin and intimin              | WP_011146312.1 | NS     | 18.17  |
| PluDJC_20255      |             | Hypothetical insectidal toxins, Some similarities with putative juvenile hormone esterase | WP_011148213.1 | NS     | -7.05  |
| PluDJC_20260      |             | Hypothetical toxin                                                                        | WP_011148214.1 | NS     | -11.71 |
| PluDJC_20375      |             | Putative toxin                                                                            | WP_011148235.1 | -8.38  | NS     |
| <b>Antibiotic</b> |             |                                                                                           |                |        |        |
| <b>Synthesis</b>  |             |                                                                                           |                |        |        |
| PluDJC_04515      |             | Some similarities with killer protein of pyocin S3                                        | WP_011145251.1 | 4.37   | 17.63  |
| PluDJC_04530      |             | Similar to C-terminal region of klebicin B, pyocin S2 and the killer protein of pyocin S1 | WP_071824155.1 | 4.61   | 26.04  |
| PluDJC_04540      |             | Similar to killer protein of pyocin S3                                                    | WP_082303108.1 | 11.65  | NS     |
| PluDJC_04580      |             | Probable protein involved in antibiotic biosynthesis                                      | WP_011145262.1 | -11.29 | NS     |
| PluDJC_04585      |             | Probable protein involved in antibiotic biosynthesis                                      | WP_011145263.1 | -5.06  | NS     |
| PluDJC_04590      |             | Probable protein involved in antibiotic biosynthesis                                      | WP_011145264.1 | -4.90  | NS     |
| PluDJC_04860      |             | Antibiotic biosynthesis monooxygenase                                                     | WP_011145312.1 | -6.05  | NS     |
| PluDJC_09845      |             | Some high similarities with killer protein of pyocin S3                                   | --             | 7.84   | NS     |
| PluDJC_09855      |             | Probable toxin, Similar to pyocin S2 and S1                                               | --             | 7.56   | NS     |
| PluDJC_11880      | <i>sttA</i> | Stilbene A, Similar to histidine ammonia-lyase                                            | WP_011146484.1 | -4.95  | NS     |
| PluDJC_15990      |             | Probable protein involved in antibiotic biosynthesis                                      | WP_011147343.1 | NS     | -5.47  |

|                   |                                                                            |                            |                |        |
|-------------------|----------------------------------------------------------------------------|----------------------------|----------------|--------|
| PluDJC_16670      | Highly similar to proteins involved in antibiotic biosynthesis             | WP_011147463.1             | -5.58          | NS     |
| <b>Resistance</b> |                                                                            |                            |                |        |
| PluDJC_04520      | Similar to colicin / pyocin immunity protein                               | WP_011145252.1             | 4.91           | 29.69  |
| PluDJC_04525      |                                                                            | WP_011145253.1             | 3.64           | 40.95  |
| PluDJC_04535      |                                                                            | WP_011145254.1             | 4.81           | 38.58  |
| PluDJC_04545      |                                                                            | WP_011145255.1             | 8.96           | NS     |
| PluDJC_04550      |                                                                            | WP_011145256.1             | 8.74           | NS     |
| PluDJC_04555      |                                                                            | WP_011145257.1             | 4.52           | NS     |
| PluDJC_06645      | Similar to metal-dependent hydrolases of the beta-lactamase superfamily II | WP_011145677.1             | -10.08         | -17.03 |
| PluDJC_09840      | Similarities with immunity protein of pyocin S3                            | WP_011146156.1             | 6.99           | NS     |
| PluDJC_09850      | Similar to colicin E2 immunity protein                                     | WP_011146157.1             | 11.22          | NS     |
| PluDJC_20210      | Similar to putative transport protein and multidrug resistance protein     | WP_011148206.1             | 25.30          | NS     |
| PluDJC_20605      | Similar to pyocin S3 immunity protein                                      | WP_011148275.1             | 3.46           | NS     |
| PluDJC_20610      |                                                                            | WP_011148276.1             | 3.73           | NS     |
| PluDJC_20615      |                                                                            | WP_011148277.1             | 3.32           | NS     |
| PluDJC_20625      |                                                                            | WP_011148279.1             | NS             | 8.66   |
| PluDJC_20630      |                                                                            | WP_011148280.1             | 3.46           | 6.73   |
| PluDJC_21500      |                                                                            | MBL fold metallo-hydrolase | WP_011148437.1 | NS     |

## LPS

### O-antigen biosynthesis

|              |             |                                                    |                |       |       |
|--------------|-------------|----------------------------------------------------|----------------|-------|-------|
| PluDJC_24130 | <i>wbO</i>  | Predicted sugar 1-phosphate nucleotidyltransferase | WP_011148859.1 | NS    | 9.33  |
| PluDJC_24135 | <i>wbQ</i>  | Similar to amino or hexapeptide transferase        | WP_011148860.1 | NS    | 32.72 |
| PluDJC_24140 | <i>wbA</i>  | Similar to sugar or UDP-sugar dehydrogenases       | WP_011148861.1 | -3.34 | NS    |
| PluDJC_24205 | <i>wbB</i>  | Similar to sugar or UDP-sugar dehydrogenases       | WP_011148874.1 | -3.32 | NS    |
| PluDJC_24215 | <i>wbC</i>  | Similar to amino or hexapeptide transferase        | WP_041380434.1 | -3.08 | NS    |
| PluDJC_24220 | <i>wzxB</i> | Putative O-antigen translocase                     | WP_041380435.1 | NS    | 10.32 |

### Regulators

|              |                 |                                                                 |                |       |       |
|--------------|-----------------|-----------------------------------------------------------------|----------------|-------|-------|
| PluDJC_00050 | <i>ogrK</i>     | Probable positive regulator of phage P2 late gene transcription | WP_011144421.1 | NS    | -9.65 |
| PluDJC_00940 | <i>uxuR</i>     | Uxu operon transcriptional regulator                            | WP_011144573.1 | 3.39  | NS    |
| PluDJC_01435 |                 | CaiF/GrlA family transcriptional regulator                      | WP_011144669.1 | 4.81  | NS    |
| PluDJC_02000 |                 | Putative transcriptional regulator, LysR-family                 | WP_011144796.1 | 5.64  | NS    |
| PluDJC_02795 | <i>arcA</i>     | Negative response regulator of genes in aerobic pathways        | WP_011144944.1 | -3.20 | NS    |
| PluDJC_04155 | <i>uhpC</i>     | Regulatory protein UhpC                                         | WP_082303107.1 | 4.80  | NS    |
| PluDJC_04255 | <i>agaR</i>     | Putative aga operon transcriptional repressor                   | WP_011145204.1 | 3.43  | NS    |
| PluDJC_04695 | <i>ner-like</i> | Probable transcriptional regulator                              | WP_011145282.1 | 41.68 | 28.05 |



|              |                 |                                                                               |                                       |                |       |    |
|--------------|-----------------|-------------------------------------------------------------------------------|---------------------------------------|----------------|-------|----|
| PluDJC_04840 | <i>ner-like</i> | Probable transcriptional regulator                                            | WP_011145309.1                        | -4.40          | NS    |    |
| PluDJC_04850 |                 | LuxR family transcriptional regulator                                         | WP_011145310.1                        | 15.28          | NS    |    |
| PluDJC_04865 |                 | MarR family transcriptional regulator                                         | WP_011145313.1                        | -5.49          | NS    |    |
| PluDJC_05030 | <i>hpaA</i>     | Regulator of the 4HPA-hydroxylase operon                                      | WP_011145343.1                        | 4.76           | NS    |    |
| PluDJC_07465 |                 | Transcriptional regulator                                                     | WP_041380007.1                        | -3.04          | NS    |    |
| PluDJC_09555 |                 | LuxR family transcriptional regulator                                         | WP_011146094.1                        | NS             | 30.76 |    |
| PluDJC_10335 |                 | MurR/RpiR family transcriptional regulator                                    | WP_011146246.1                        | 3.31           | NS    |    |
| PluDJC_10355 | <i>fimB</i>     | Similar to type 1 fimbriae regulatory recombinase protein of Escherichia coli | WP_011146249.1                        | 3.17           | 7.88  |    |
| PluDJC_10415 |                 | Transcription regulator, LuxR family (PAS4)                                   | WP_011146260.1                        | 4.45           | 5.96  |    |
| PluDJC_10420 |                 |                                                                               | WP_011146261.1                        | 6.52           | NS    |    |
| PluDJC_10430 |                 |                                                                               | WP_011146262.1                        | 4.51           | NS    |    |
| PluDJC_10435 |                 |                                                                               | WP_011146263.1                        | 6.34           | NS    |    |
| PluDJC_10440 |                 |                                                                               | WP_011146264.1                        | 6.48           | NS    |    |
| PluDJC_10445 |                 |                                                                               | WP_011146265.1                        | 5.92           | NS    |    |
| PluDJC_10450 |                 |                                                                               | WP_011146266.1                        | 4.73           | NS    |    |
| PluDJC_10460 |                 |                                                                               | WP_011146267.1                        | 3.65           | NS    |    |
| PluDJC_12280 |                 |                                                                               | AraC family transcriptional regulator | WP_011146557.1 | -3.63 | NS |
| PluDJC_13835 |                 |                                                                               | AraC family transcriptional regulator | WP_011146860.1 | -6.72 | NS |
| PluDJC_16255 | <i>tctD</i>     | Two-component response regulator                                              | WP_011147386.1                        | 7.16           | NS    |    |

|              |             |                                                                |                |        |        |
|--------------|-------------|----------------------------------------------------------------|----------------|--------|--------|
| PluDJC_18380 |             | Transcriptional regulator LuxR family                          | WP_011147865.1 | NS     | 8.30   |
| PluDJC_18405 | <i>abgR</i> | Putative transcriptional regulator AbgR                        | WP_011147869.1 | 3.90   | NS     |
| PluDJC_21150 |             | Transcriptional regulator, LuxR family                         | WP_011148371.1 | 3.93   | NS     |
| PluDJC_20190 |             | RraA family protein                                            | WP_011148201.1 | 21.51  | NS     |
| PluDJC_21240 |             | Transcriptional regulator, HTH-XRE superfamily                 | WP_011148389.1 | 469.99 | 65.30  |
| PluDJC_21265 |             | Transcriptional regulator, HTH-XRE superfamily                 | WP_011148394.1 | -42.73 | -49.00 |
| PluDJC_22590 | <i>pluR</i> | Transcriptional regulator, LuxR family (PluR)                  | WP_011148637.1 | -3.30  | -9.26  |
| PluDJC_23170 |             | Some similarities with probable transcriptional regulator LumQ | WP_011148740.1 | -3.74  | NS     |

## Adhesion

### Fimbrial

|              |  |                                                          |                |       |       |
|--------------|--|----------------------------------------------------------|----------------|-------|-------|
| PluDJC_01390 |  | Some similarities with type 1 fimbrial protein precursor | WP_011144660.1 | 11.75 | 11.64 |
| PluDJC_01395 |  | Putative fimbrial chaperone                              | WP_011144661.1 | 6.37  | 5.18  |
| PluDJC_01400 |  | unknown                                                  | WP_011144662.1 | 7.54  | 5.23  |
| PluDJC_01405 |  | Similar to putative fimbrial protein                     | WP_011144663.1 | 5.92  | 6.62  |
| PluDJC_01410 |  | unknown                                                  | WP_041379865.1 | 3.97  | 6.75  |
| PluDJC_01415 |  | Putative fimbrial chaperone                              | WP_011144665.1 | 5.58  | 6.56  |
| PluDJC_01420 |  | Putative fimbrial chaperone                              | WP_011144666.1 | 6.55  | 4.67  |
| PluDJC_01425 |  | Probable export and assembly of type 1 fimbriae          | WP_049789718.1 | 5.73  | NS    |

|              |             |                                                                                                                                                             |                |        |        |
|--------------|-------------|-------------------------------------------------------------------------------------------------------------------------------------------------------------|----------------|--------|--------|
| PluDJC_02045 |             | Probable recombinase involved in the regulation of fimbrial operon                                                                                          | WP_011144805.1 | 8.70   | NS     |
| PluDJC_02510 |             | Some similarities with major fimbrial subunit precursor. Putative secreted protein                                                                          | WP_011144892.1 | -3.65  | NS     |
| PluDJC_03915 | <i>mrfA</i> | Highly similar to major structural subunit MrpA of <i>Proteus mirabilis</i> - cell adhesion                                                                 | WP_011145143.1 | -40.49 | NS     |
| PluDJC_03920 | <i>mrfB</i> | MrfB protein, by similarities may function as the terminator for fimbrial assembly.                                                                         | WP_011145144.1 | -25.58 | NS     |
| PluDJC_03925 | <i>mrfC</i> | Probable export and assembly of type 1 fimbriae                                                                                                             | WP_011145145.1 | -7.48  | NS     |
| PluDJC_03930 | <i>mrfD</i> | Highly similar to periplasmic fimbrial chaperone precursor MrpD of <i>Proteus mirabilis</i>                                                                 | WP_011145146.1 | -4.26  | NS     |
| PluDJC_03935 | <i>mrfX</i> | Fimbrial minor pilin protein precursor                                                                                                                      | WP_011145147.1 | -6.58  | NS     |
| PluDJC_03940 | <i>mrfE</i> | Minor fimbrial subunit and to MrpE from fimbrial operon                                                                                                     | WP_011145148.1 | -4.17  | NS     |
| PluDJC_03945 | <i>mrfF</i> | Minor fimbrial subunit protein MrpF of <i>Proteus mirabilis</i>                                                                                             | WP_011145149.1 | -3.85  | NS     |
| PluDJC_03950 | <i>mrfG</i> | Fimbrial protein MrpG of <i>Proteus mirabilis</i> , a putative minor subunit of the MR/P fimbria, functions as an adhesin responsible for hemagglutination. | WP_011145150.1 | -6.09  | NS     |
| PluDJC_04005 |             | unknown                                                                                                                                                     | WP_011145160.1 | NS     | -16.63 |
| PluDJC_04010 |             | Putative fimbrial chaperone                                                                                                                                 | WP_011145161.1 | NS     | -17.27 |
| PluDJC_04015 |             | unknown                                                                                                                                                     | WP_011145162.1 | NS     | -16.77 |
| PluDJC_04020 |             | Putative fimbrial chaperone                                                                                                                                 | WP_011145163.1 | NS     | -24.51 |

|              |             |                             |                |       |    |
|--------------|-------------|-----------------------------|----------------|-------|----|
| PluDJC_05115 | <i>phfC</i> | Putative fimbrial chaperone | WP_011145359.1 | -6.19 | NS |
| PluDJC_05120 | <i>phfS</i> | Probable fimbrial adhesin   | WP_011144660.1 | -4.81 | NS |

### **Nonfimbrial**

|              |  |                                                                                |                |       |        |
|--------------|--|--------------------------------------------------------------------------------|----------------|-------|--------|
| PluDJC_07690 |  | Similar to dictyostelium discoideum calcium-dependent cell adhesion molecule-1 | WP_011145858.1 | NS    | -30.20 |
| PluDJC_13040 |  | Attachment protein                                                             | WP_011146704.1 | -3.66 | NS     |

### **Motility and Chemotaxis**

#### **Flagella formation**

|              |             |                                                                                                  |                |      |    |
|--------------|-------------|--------------------------------------------------------------------------------------------------|----------------|------|----|
| PluDJC_09685 | <i>flhD</i> | flagellar transcriptional activator                                                              | WP_011146117.1 | 3.15 | NS |
| PluDJC_09860 | <i>flhB</i> | Flagellar biosynthetic protein FlhB                                                              | WP_011146159.1 | 3.41 | NS |
| PluDJC_09950 | <i>flgB</i> | Flagellar basal-body rod protein FlgB (Putative proximal rod protein)                            | WP_011146177.1 | 6.74 | NS |
| PluDJC_09955 | <i>flgC</i> | Flagellar basal-body rod protein FlgC (Putative proximal rod protein)                            | WP_011146178.1 | 6.63 | NS |
| PluDJC_09960 | <i>flgD</i> | Basal-body rod modification protein FlgD (flagellar protein for the initiation of hook assembly) | WP_011146179.1 | 5.76 | NS |
| PluDJC_09965 | <i>flgE</i> | Flagellar hook protein FlgE                                                                      | WP_011146180.1 | 5.35 | NS |
| PluDJC_09970 | <i>flgF</i> | Flagellar basal-body rod protein FlgF (Putative proximal rod protein)                            | WP_011146181.1 | 4.87 | NS |
| PluDJC_09975 | <i>flgG</i> | Flagellar basal-body rod protein FlgG (Distal rod protein)                                       | WP_011146182.1 | 4.95 | NS |

|              |             |                                                                             |                |       |      |
|--------------|-------------|-----------------------------------------------------------------------------|----------------|-------|------|
| PluDJC_09980 | <i>flgH</i> | Flagellar L-ring protein precursor (Basal body L-ring protein)              | WP_011146183.1 | 3.26  | NS   |
| PluDJC_09985 | <i>flgI</i> | Flagellar P-ring protein precursor (Basal body P-ring protein)              | WP_011146184.1 | 3.28  | NS   |
| PluDJC_09995 | <i>flgK</i> | Flagellar hook-associated protein 1 (HAP1)                                  | WP_011146186.1 | 8.57  | 4.53 |
| PluDJC_10000 | <i>flgL</i> | Flagellar hook-associated protein 3 (HAP3) (Hook-filament junction protein) | WP_011146187.1 | 8.92  | NS   |
| PluDJC_10085 | <i>fliL</i> | Flagellar protein FliL                                                      | WP_011146204.1 | 3.71  | NS   |
| PluDJC_10095 | <i>fliJ</i> | Flagellar protein FliJ                                                      | WP_011146206.1 | 3.06  | NS   |
| PluDJC_10100 | <i>fliI</i> | Flagellum-specific ATP synthase                                             | WP_011146207.1 | 3.31  | NS   |
| PluDJC_10110 | <i>fliG</i> | Flagellar motor switch protein FliG                                         | WP_011146209.1 | 3.04  | NS   |
| PluDJC_10115 | <i>fliF</i> | Flagellar basal-body M-ring protein                                         | WP_011146210.1 | 4.00  | NS   |
| PluDJC_10120 | <i>fliE</i> | Flagellar hook-basal body 11K protein FliE                                  | WP_011146211.1 | 4.75  | NS   |
| PluDJC_10140 | <i>fliT</i> | Flagellar protein FliT                                                      | WP_011146213.1 | 5.08  | NS   |
| PluDJC_10145 | <i>fliS</i> | Flagellar protein FliS                                                      | WP_011146214.1 | 8.56  | NS   |
| PluDJC_10150 | <i>fliD</i> | Flagellar hook-associated protein 2 (HAP2) (Filament cap protein)           | WP_011146215.1 | 15.77 | 4.21 |
| PluDJC_10155 | <i>fliC</i> | Flagellin                                                                   | WP_011146216.1 | 25.47 | NS   |

### Chemoreceptors

|              |             |                                                                                    |                |      |    |
|--------------|-------------|------------------------------------------------------------------------------------|----------------|------|----|
| PluDJC_09715 | <i>cheD</i> | Methyl-accepting chemotaxis protein I (MCP-I) (Serine chemoreceptor protein) = tsr | WP_011146123.1 | 5.93 | NS |
|--------------|-------------|------------------------------------------------------------------------------------|----------------|------|----|

|              |                                                                                         |                |      |    |
|--------------|-----------------------------------------------------------------------------------------|----------------|------|----|
| PluDJC_09720 | Similar to methyl-accepting chemotaxis protein I (MCP-I) (Serine chemoreceptor protein) | WP_011146124.1 | 4.01 | NS |
|--------------|-----------------------------------------------------------------------------------------|----------------|------|----|

**Extracellular and secretion related proteins**

**Type VI secretion system**

|              |                                                             |                |       |       |
|--------------|-------------------------------------------------------------|----------------|-------|-------|
| PluDJC_01820 | Type VI secretion system contractile sheath small subunit   | WP_011144761.1 | NS    | 19.73 |
| PluDJC_01970 | Highly similar to type VI secretion system tube protein Hcp | WP_011144790.1 | 8.00  | NS    |
| PluDJC_10005 | Type VI secretion system tip protein VgrG-like              | WP_011146188.1 | 4.10  | 4.73  |
| PluDJC_13450 | Highly similar to type VI secretion system tube protein Hcp | WP_011146791.1 | 8.38  | 18.49 |
| PluDJC_16115 | Highly similar to type VI secretion system tube protein Hcp | WP_011147363.1 | 4.35  | NS    |
| PluDJC_16550 | Type VI secretion system lipoprotein TssJ-like              | WP_011147441.1 | 4.22  | NS    |
| PluDJC_16595 | Type VI secretion system tip protein VgrG-like              | WP_011147450.1 | 4.71  | NS    |
| PluDJC_16640 | Highly similar to type VI secretion system tube protein Hcp | WP_011147458.1 | 4.19  | NS    |
| PluDJC_20795 | Highly similar to type VI secretion system tube protein Hcp | WP_011148312.1 | 8.68  | NS    |
| PluDJC_22815 | Type VI secretion system baseplate subunit TssF-like        | WP_011148673.1 | 15.73 | NS    |
| PluDJC_22820 | Type VI secretion system tip protein VgrG-like              | WP_011148674.1 | 13.95 | NS    |

**Other**

|              |            |                                                                           |                |        |        |
|--------------|------------|---------------------------------------------------------------------------|----------------|--------|--------|
| PluDJC_00540 |            | Putative secreted protein                                                 | WP_011144510.1 | -4.26  | -11.47 |
| PluDJC_01210 |            | Unknown, probable hemolysin secretion/activation protein                  | WP_011144626.1 | 8.43   | NS     |
| PluDJC_02845 |            | Similar to monofunctional chorismate mutase.<br>Putative secreted protein | WP_011144952.1 | NS     | 4.66   |
| PluDJC_03200 |            | HlyD family type I secretion periplasmic adaptor subunit                  | WP_011145011.1 | 7.14   | NS     |
| PluDJC_05475 |            | Probable hemolysin secretion/activation protein                           | WP_011145477.1 | 3.62   | NS     |
| PluDJC_05570 |            | Hypothetical secreted protein                                             | WP_011146048.1 | NS     | 13.24  |
| PluDJC_10020 |            | Hypothetical secreted protein                                             | WP_011146191.1 | 3.20   | NS     |
| PluDJC_12275 |            | Probable lipase                                                           | WP_011146556.1 | 7.87   | NS     |
| PluDJC_12385 |            | Hypothetical secreted protein                                             | WP_011146573.1 | -22.32 | NS     |
| PluDJC_15670 |            | Probable hemolysin                                                        | WP_011147281.1 | 9.77   | NS     |
| PluDJC_15675 |            | Probable hemolysin secretion/activation protein                           | WP_011147282.1 | 7.31   | NS     |
| PluDJC_16145 | <i>pdl</i> | Lipase                                                                    | WP_011147368.1 | NS     | -6.33  |
| PluDJC_16510 |            | Putative secreted protein                                                 | WP_011147432.1 | 3.30   | NS     |
| PluDJC_16515 |            | Putative secreted protein                                                 | WP_011147433.1 | 4.59   | NS     |
| PluDJC_16575 |            | Putative secreted protein                                                 | WP_011147446.1 | 3.47   | NS     |
| PluDJC_16585 |            | Putative secreted protein                                                 | WP_011147448.1 | 4.43   | NS     |

|                     |             |                                                                                                    |                |         |        |
|---------------------|-------------|----------------------------------------------------------------------------------------------------|----------------|---------|--------|
| PluDJC_17615        |             | Similar to outer membrane hemolysin activator protein                                              | WP_011147747.1 | 23.92   | NS     |
| PluDJC_21900        |             | Twin-arginine translocation signal domain-containing protein; similar to putative exported protein | WP_011148509.1 | NS      | -13.32 |
| <b><u>Other</u></b> |             |                                                                                                    |                |         |        |
| PluDJC_01670        |             | Putative AidA protein (quorum-sensing and slow killing of <i>C. elegans</i> )                      | WP_011144713.1 | -101.80 | -7.46  |
| PluDJC_01680        |             | Truncated gene. Highly similar in N terminal to VgrG and VgrE related protein of Photorhabdus      |                | 8.66    | 27.93  |
| PluDJC_04355        |             | Truncated gene. Similar to regions of colicin V secretion protein                                  |                | -54.15  | NS     |
| PluDJC_08505        |             | Truncated gene. Some similarities with unknown protein                                             |                | NS      | 6.92   |
| PluDJC_08650        |             | Truncated gene. Highly similar to N-term of unknown protein of Photorhabdus                        |                | NS      | -5.91  |
| PluDJC_09205        |             | Truncated gene, similar to C terminal part of unknown protein                                      |                | NS      | 7.47   |
| PluDJC_12460        |             | Similar to chitinase and chitin binding protein precursor                                          | WP_011146588.1 | NS      | 4.43   |
| PluDJC_13025        | <i>ompW</i> | Outer membrane protein W precursor                                                                 | WP_011146701.1 | -5.90   | -4.86  |
| PluDJC_13840        |             | Some similarities with hypothetical glycine-rich protein                                           | WP_011146861.1 | NS      | -12.19 |



|              |                  |                                                                                                    |                |        |       |
|--------------|------------------|----------------------------------------------------------------------------------------------------|----------------|--------|-------|
| PluDJC_14125 | <i>yebF</i>      | Similar to lipoprotein YebF precursor of Escherichia coli                                          | WP_011146914.1 | 8.05   | NS    |
| PluDJC_14225 |                  | Truncated gene. Similar to DNA invertase or putative resolvase                                     |                | NS     | -4.13 |
| PluDJC_16860 |                  | Truncated gene. Similar to the N-terminal region of VgrG proteins                                  |                | 3.09   | NS    |
| PluDJC_20580 |                  | Truncated gene. Highly similar to the N-terminal region of insecticidal toxin complex protein TccZ |                | 3.06   | NS    |
| PluDJC_21245 | <i>CcdA-like</i> | Similar to CcdA protein which binds to and blocks the activity of CcdB                             | WP_011148390.1 | 201.79 | NS    |
| PluDJC_21250 | <i>CcdB-like</i> | Similarities with the N-terminal region of cytotoxic protein CcdB. Putative truncated protein      | WP_011148391.1 | 26.82  | 19.37 |
| PluDJC_04125 |                  | Type II toxin-antitoxin system HicB family antitoxin                                               | WP_011145181.1 | 3.28   | NS    |

### **AI-2 and polyamine related synthesis**

|              |             |                                                         |                |       |      |
|--------------|-------------|---------------------------------------------------------|----------------|-------|------|
| PluDJC_03525 | <i>metI</i> | D-methionine transport permease protein MetI            | WP_011145072.1 | -4.25 | NS   |
| PluDJC_03530 | <i>metN</i> | D-methionine transport ATP-binding protein MetN         | WP_011145073.1 | -3.86 | NS   |
| PluDJC_04305 | <i>speD</i> | S-adenosylmethionine decarboxylase proenzyme            | WP_011145214.1 | NS    | 6.91 |
| PluDJC_04310 | <i>speE</i> | Spermidine synthase (putrescine aminopropyltransferase) | WP_011145215.1 | 3.55  | 9.39 |
| PluDJC_06280 | <i>gltL</i> | Gutamate/aspartate ABC transporter                      | WP_011145628.1 | 6.38  | NS   |
| PluDJC_06285 | <i>gltK</i> |                                                         | WP_011145629.1 | 7.58  | NS   |

|              |             |                                                                                            |                |        |    |
|--------------|-------------|--------------------------------------------------------------------------------------------|----------------|--------|----|
| PluDJC_06290 | <i>gltJ</i> |                                                                                            | WP_011145630.1 | 23.27  | NS |
| PluDJC_06295 | <i>gltI</i> |                                                                                            | WP_011145631.1 | 59.42  | NS |
| PluDJC_16065 | <i>lsrA</i> | ATP-binding protein of AI-2 transporter                                                    | WP_011147354.1 | 5.47   | NS |
| PluDJC_16070 | <i>lsrC</i> | Inner Membrane protein of AI-2 transporter                                                 | WP_011147355.1 | 3.92   | NS |
| PluDJC_16075 | <i>lsrD</i> | Inner Membrane protein of AI-2 transporter                                                 | WP_011147356.1 | 3.42   | NS |
| PluDJC_16080 | <i>lsrB</i> | Binding Protein of AI-2 transporter                                                        | WP_011147357.1 | 5.72   | NS |
| PluDJC_16085 | <i>lsrF</i> | AI-2-processing aldolase                                                                   | WP_011147358.1 | 6.12   | NS |
| PluDJC_16090 | <i>lsrG</i> | AI-2 processing protein                                                                    | WP_011147359.1 | 8.46   | NS |
| PluDJC_18085 | <i>metK</i> | S-adenosylmethionine synthetase (methionine adenosyltransferase) (AdoMet synthetase) (MAT) | WP_011147846.1 | -4.41  | NS |
| PluDJC_21905 | <i>metE</i> | Methionine synthase                                                                        | WP_011148510.1 | -9.11  | NS |
| PluDJC_23675 | <i>metF</i> | 5,10-methylenetetrahydrofolate reductase                                                   | WP_011148819.1 | -23.54 | NS |

### **Stress response**

|              |             |                                                        |                |       |    |
|--------------|-------------|--------------------------------------------------------|----------------|-------|----|
| PluDJC_01585 | <i>dppA</i> | Periplasmic dipeptide transport protein precursor DppA | WP_011144697.1 | 98.34 | NS |
| PluDJC_01590 | <i>dppB</i> | Dipeptide transport system permease protein            | WP_011144698.1 | 19.09 | NS |
| PluDJC_01595 | <i>dppC</i> | Dipeptide transport system permease protein            | WP_011144699.1 | 14.37 | NS |
| PluDJC_01600 | <i>dppD</i> | Dipeptide transport ATP-binding protein DppD           | WP_011144700.1 | 13.76 | NS |
| PluDJC_01605 | <i>dppF</i> | Dipeptide transport ATP-binding protein DppF           | WP_011144701.1 | 11.34 | NS |

|              |             |                                                                      |                |       |      |
|--------------|-------------|----------------------------------------------------------------------|----------------|-------|------|
| PluDJC_07845 | <i>cspD</i> | Cold shock-like protein; induced upon starvation or oxidative stress | WP_011145889.1 | 5.01  | NS   |
| PluDJC_10850 | <i>usp</i>  | Universal stress protein                                             | WP_011146288.1 | -4.27 | NS   |
| PluDJC_10880 | <i>phoH</i> | Phosphate starvation-inducible protein                               | WP_011146295.1 | NS    | 5.93 |
| PluDJC_18730 | <i>cspI</i> | Cold shock-like protein                                              | WP_011147931.1 | NS    | 3.99 |
| PluDJC_22375 | <i>cstA</i> | Carbon starvation protein A                                          | WP_011148598.1 | NS    | 4.95 |

### **Pigmentation**

|              |             |                            |                |        |        |
|--------------|-------------|----------------------------|----------------|--------|--------|
| PluDJC_20685 | <i>antI</i> | Anthraquinone biosynthesis | WP_011148290.1 | -12.73 | -30.02 |
| PluDJC_20690 | <i>antH</i> |                            | WP_011148291.1 | -12.11 | -10.52 |
| PluDJC_20695 | <i>antG</i> |                            | WP_011148292.1 | -20.86 | NS     |
| PluDJC_20700 | <i>antF</i> |                            | WP_011148293.1 | -30.46 | -26.52 |
| PluDJC_20705 | <i>antE</i> |                            | WP_011148294.1 | -20.61 | NS     |
| PluDJC_20710 | <i>antD</i> |                            | WP_011148295.1 | -35.16 | -13.11 |
| PluDJC_20715 | <i>antC</i> |                            | WP_011148296.1 | -36.69 | -15.25 |
| PluDJC_20720 | <i>antB</i> |                            | WP_011148297.1 | -19.52 | -57.15 |
| PluDJC_20725 | <i>antA</i> |                            | WP_011148298.1 | -19.71 | -25.95 |

### **CRISPR-Cas**

|              |                                |                |      |      |
|--------------|--------------------------------|----------------|------|------|
| PluDJC_03795 | CRISPR-associated cas3-cluster | WP_011145119.1 | 5.33 | 4.61 |
| PluDJC_03800 |                                | WP_011145120.1 | 3.96 | NS   |

|              |  |  |                |      |    |
|--------------|--|--|----------------|------|----|
| PluDJC_03805 |  |  | WP_011145121.1 | 3.81 | NS |
| PluDJC_03810 |  |  | WP_011145122.1 | 4.39 | NS |
| PluDJC_03815 |  |  | WP_011145123.1 | 7.67 | NS |
| PluDJC_03820 |  |  | WP_011145124.1 | 8.74 | NS |

### **Cell clumping**

|              |             |                                      |                |    |         |
|--------------|-------------|--------------------------------------|----------------|----|---------|
| PluDJC_22595 | <i>pcfF</i> | Carbamoyl-phosphate synthase subunit | WP_011148638.1 | NS | -64.84  |
| PluDJC_22600 | <i>pcfE</i> | Efflux transporter                   | WP_049789808.1 | NS | -87.19  |
| PluDJC_22605 | <i>pcfD</i> | Carbamoyl transferase, NodU family   | WP_011148640.1 | NS | -110.61 |
| PluDJC_22610 | <i>pcfC</i> | Glycine amidino transferase          | WP_011148641.1 | NS | -100.05 |
| PluDJC_22615 | <i>pcfB</i> | Argininosuccinate synthase           | WP_011148642.1 | NS | -10.98  |
| PluDJC_22620 | <i>pcfA</i> | Cysteine synthase                    | WP_011148643.1 | NS | -10.52  |

### **Crystalline inclusions**

|              |                  |                                                                      |                |       |        |
|--------------|------------------|----------------------------------------------------------------------|----------------|-------|--------|
| PluDJC_00865 | <i>cipB</i>      | Crystalline inclusion protein CipB                                   | WP_011144559.1 | NS    | -16,21 |
| PluDJC_07765 | <i>cipA-like</i> | Similar to crystalline inclusion protein type II (CipA-like protein) | WP_011145872.1 | -4.20 | -47.76 |
| PluDJC_07770 | <i>cipA</i>      | Crystalline inclusion protein CipA                                   | WP_011145873.1 | -5.01 | -27.91 |

### **DNA replication, recombination and repair**

|              |                |                                                   |                |      |       |
|--------------|----------------|---------------------------------------------------|----------------|------|-------|
| PluDJC_05285 |                | Probable DNA helicase                             | WP_011145389.1 | NS   | 9.67  |
| PluDJC_17195 | <i>recN</i>    | DNA repair protein recN (recombination protein N) | WP_011147558.1 | 3.43 | NS    |
| PluDJC_23045 | <i>ISPlu4A</i> | Transposase                                       | WP_011144714.1 | NS   | -4.01 |

### **Bioluminescence**

|              |             |                      |                |    |        |
|--------------|-------------|----------------------|----------------|----|--------|
| PluDJC_11100 | <i>luxC</i> | Fatty acid reductase | WP_011146334.1 | NS | -11.56 |
| PluDJC_11105 | <i>luxD</i> | Acyl transferase     | WP_011146335.1 | NS | -10.85 |

### **Proteins with unknown function**

|              |  |                                                                |                |       |       |
|--------------|--|----------------------------------------------------------------|----------------|-------|-------|
| PluDJC_00425 |  | DUF2282 domain-containing protein                              | WP_011144488.1 | 4.55  | 16.41 |
| PluDJC_00875 |  | Fatty acid desaturase                                          | WP_082303147.1 | NS    | -6.52 |
| PluDJC_00880 |  | Hypothetical protein                                           | WP_041380490.1 | -3.17 | NS    |
| PluDJC_00930 |  | Hypothetical protein                                           | CAE12464       | 4.09  | 7.15  |
| PluDJC_01045 |  | Hypothetical protein                                           | WP_011144594.1 | -3.23 | NS    |
| PluDJC_01200 |  | Hypothetical protein                                           | WP_011144624.1 | 8.26  | NS    |
| PluDJC_01205 |  | filamentous hemagglutinin N-terminal domain-containing protein | WP_011144625.1 | 20.02 | NS    |
| PluDJC_01370 |  | Hypothetical protein                                           | WP_011144656.1 | 85.85 | 28.50 |
| PluDJC_01375 |  | Hypothetical protein                                           | WP_011144657.1 | 73.74 | 32.87 |
| PluDJC_01430 |  | Hypothetical protein                                           | WP_041379866.1 | 4.90  | 4.15  |

|              |                                   |                |       |       |
|--------------|-----------------------------------|----------------|-------|-------|
| PluDJC_01442 | Hypothetical protein              | WP_041379867.1 | 4.65  | NS    |
| PluDJC_01465 | Hypothetical protein              | WP_011144675.1 | 3.50  | NS    |
| PluDJC_01470 | Hypothetical protein              | WP_011144676.1 | 6.25  | NS    |
| PluDJC_01475 | Hypothetical protein              | WP_011144677.1 | 6.97  | 10.93 |
| PluDJC_01480 | Hypothetical protein              | WP_041380511.1 | 7.28  | 12.19 |
| PluDJC_01485 | Hypothetical protein              | WP_011144680.1 | 9.86  | 7.00  |
| PluDJC_01655 | Hypothetical protein              | WP_011144710.1 | -3.18 | NS    |
| PluDJC_01915 | Hypothetical protein              | WP_011144779.1 | NS    | 8.94  |
| PluDJC_01975 | Hypothetical protein              | WP_011144791.1 | NS    | 18.67 |
| PluDJC_01980 | Hypothetical protein              | WP_011144792.1 | NS    | 6.34  |
| PluDJC_01990 | DUF1240 domain-containing protein | WP_011144794.1 | 3.32  | NS    |
| PluDJC_02610 | Hypothetical protein              | WP_041379897.1 | 5.94  | NS    |
| PluDJC_02620 | DUF692 family protein             | WP_011144911.1 | 23.16 | NS    |
| PluDJC_02625 | DUF692 family protein             | WP_011144912.1 | 25.75 | NS    |
| PluDJC_03205 | Hypothetical protein              | WP_011145012.1 | 8.10  | NS    |
| PluDJC_03210 | Hypothetical protein              | WP_011145013.1 | 7.41  | NS    |
| PluDJC_03215 | Hypothetical protein              | WP_011145014.1 | 7.55  | NS    |
| PluDJC_03220 | Hypothetical protein              | WP_011145015.1 | 10.37 | NS    |
| PluDJC_03225 | Hypothetical protein              | WP_011145016.1 | 9.01  | NS    |
| PluDJC_03230 | Hypothetical protein              | WP_011145017.1 | 9.69  | NS    |

|              |                                   |                |        |        |
|--------------|-----------------------------------|----------------|--------|--------|
| PluDJC_03235 | Hypothetical protein              | WP_011145018.1 | 8.95   | NS     |
| PluDJC_03745 | Hypothetical protein              | WP_011145109.1 | -16.23 | NS     |
| PluDJC_03755 | Hypothetical protein              | WP_011145111.1 | NS     | -11.15 |
| PluDJC_03760 | Hypothetical protein              | WP_011145112.1 | NS     | -9.56  |
| PluDJC_03822 | Hypothetical protein              | WP_011145125.1 | 5.12   | NS     |
| PluDJC_03890 | Hypothetical protein              | WP_011145138.1 | 3.24   | NS     |
| PluDJC_04360 | Hypothetical protein              | WP_011145224.1 | -9.32  | NS     |
| PluDJC_04365 | Hypothetical protein              | WP_011145225.1 | -9.28  | -4.60  |
| PluDJC_04370 | Hypothetical protein              | WP_011145226.1 | -11.97 | NS     |
| PluDJC_04620 | DUF1460 domain-containing protein | WP_011145268.1 | 3.97   | NS     |
| PluDJC_04775 | Hypothetical protein              | WP_011145297.1 | 11.71  | NS     |
| PluDJC_04780 | Hypothetical protein              | WP_049789740.1 | 18.06  | NS     |
| PluDJC_04790 | Hypothetical protein              | WP_011145300.1 | 29.66  | NS     |
| PluDJC_05130 | Cupin domain-containing protein   | WP_011145362.1 | -3.89  | NS     |
| PluDJC_05345 | Hypothetical protein              | WP_011145401.1 | 3.81   | NS     |
| PluDJC_05350 | Hypothetical protein              | WP_011145402.1 | 4.49   | NS     |
| PluDJC_05765 | Hypothetical protein              | WP_011145536.1 | 4.09   | NS     |
| PluDJC_06970 | DUF2517 family protein            | WP_011145728.1 | -3.38  | NS     |
| PluDJC_07210 | DUF2778 domain-containing protein | WP_011145764.1 | 6.88   | NS     |
| PluDJC_07215 | Hypothetical protein              | WP_011145765.1 | 7.33   | NS     |

|              |                                   |                |       |        |
|--------------|-----------------------------------|----------------|-------|--------|
| PluDJC_07760 | Hypothetical protein              | WP_011145871.1 | NS    | -7.48  |
| PluDJC_08430 | Hypothetical protein              | WP_011145919.1 | 3.76  | NS     |
| PluDJC_08640 | Hypothetical protein              | WP_011145958.1 | -5.41 | NS     |
| PluDJC_09650 | Hypothetical protein              | WP_011146112.1 | NS    | -17.24 |
| PluDJC_09810 | Cupin domain-containing protein   | WP_011146151.1 | NS    | -13.99 |
| PluDJC_09930 | Hypothetical protein              | WP_041380044.1 | NS    | 9.55   |
| PluDJC_10010 | DUF4123 domain-containing protein | WP_011146189.1 | 3.59  | 4.78   |
| PluDJC_10135 | DUF2829 domain-containing protein | WP_011146212.1 | 3.45  | NS     |
| PluDJC_10380 | Hypothetical protein              | WP_011146227.1 | 7.07  | NS     |
| PluDJC_10935 | Hypothetical protein              | WP_011146302.1 | NS    | -6.83  |
| PluDJC_11315 | Hypothetical protein              | WP_011146373.1 | NS    | -7.28  |
| PluDJC_11320 | Hypothetical protein              | WP_011146374.1 | NS    | -33.69 |
| PluDJC_11435 | Hypothetical protein              | WP_011146396.1 | 3.49  | NS     |
| PluDJC_11795 | Hypothetical protein              | WP_011146471.1 | NS    | -23.60 |
| PluDJC_11800 | Hypothetical protein              | WP_041380075.1 | NS    | -8.10  |
| PluDJC_12120 | DUF1778 domain-containing protein | WP_011146531.1 | 4.99  | NS     |
| PluDJC_12470 | Hypothetical protein              | WP_011146591.1 | -3.52 | -6.73  |
| PluDJC_13305 | Hypothetical protein              | WP_011146757.1 | NS    | -5.83  |
| PluDJC_13310 | Hypothetical protein              | WP_011146758.1 | NS    | 10.14  |
| PluDJC_14570 | DUF1508 domain-containing protein | WP_011146999.1 | 5.73  | NS     |



|              |                                   |                |        |        |
|--------------|-----------------------------------|----------------|--------|--------|
| PluDJC_15535 | DUF2000 domain-containing protein | WP_011147257.1 | -3.81  | NS     |
| PluDJC_15660 | Hypothetical protein              | WP_011147279.1 | 4.25   | NS     |
| PluDJC_15840 | Hypothetical protein              | WP_011147314.1 | NS     | -23.01 |
| PluDJC_15870 | Hypothetical protein              | WP_011147320.1 | 3.17   | NS     |
| PluDJC_15950 | Hypothetical protein              | WP_011147332.1 | 4.71   | NS     |
| PluDJC_15985 | Hypothetical protein              | WP_011147342.1 | -4.94  | -19.84 |
| PluDJC_16530 | Hypothetical protein              | WP_041380212.1 | 3.17   | NS     |
| PluDJC_16535 | Hypothetical protein              | WP_011147438.1 | 3.72   | NS     |
| PluDJC_16672 | Hypothetical protein              | CAE15638.1     | -12.76 | NS     |
| PluDJC_17315 | Hypothetical protein              | WP_011147688.1 | 3.08   | NS     |
| PluDJC_17565 | Hypothetical protein              | WP_011147738.1 | -3.81  | NS     |
| PluDJC_17570 | Hypothetical protein              | WP_011147739.1 | -3.62  | NS     |
| PluDJC_17717 | Hypothetical protein              | WP_071824132.1 | 3.88   | NS     |
| PluDJC_17720 | Hypothetical protein              | WP_011147775.1 | 3.25   | 5.55   |
| PluDJC_18740 | Hypothetical protein              | WP_011147933.1 | NS     | -5.46  |
| PluDJC_18745 | Hypothetical protein              | WP_011147934.1 | NS     | -6.34  |
| PluDJC_18790 | Hypothetical protein              | WP_011147942.1 | 9.11   | NS     |
| PluDJC_19930 | Hypothetical protein              | WP_011148153.1 | 4.47   | NS     |
| PluDJC_20185 | Hypothetical protein              | WP_011148200.1 | 14.18  | NS     |
| PluDJC_20205 | Hypothetical protein              | CAE16455       | 39.72  | NS     |

|              |                                   |                |       |        |
|--------------|-----------------------------------|----------------|-------|--------|
| PluDJC_20910 | Hypothetical protein              | WP_011148329.1 | -3.80 | NS     |
| PluDJC_20985 | Hypothetical protein              | WP_011148342.1 | 15.17 | NS     |
| PluDJC_21445 | Hypothetical protein              | WP_011148427.1 | NS    | -20.72 |
| PluDJC_21635 | DUF1266 domain-containing protein | WP_011148462.1 | NS    | -7.04  |
| PluDJC_21745 | Hypothetical protein              | WP_011148483.1 | NS    | -23.02 |
| PluDJC_22280 | Hypothetical protein              | WP_011148581.1 | -5.63 | NS     |
| PluDJC_22285 | DUF1471 domain-containing protein | WP_011148582.1 | -9.61 | NS     |
| PluDJC_22825 | DUF4123 domain-containing protein | WP_011148675.1 | 11.85 | 6.13   |
| PluDJC_22830 | Hypothetical protein              | WP_011148676.1 | 9.31  | 9.76   |
| PluDJC_22835 | Hypothetical protein              | WP_011148677.1 | 13.03 | NS     |
| PluDJC_22840 | Hypothetical protein              | WP_011148678.1 | 18.81 | NS     |
| PluDJC_22845 | PAAR domain-containing protein    | WP_011148679.1 | 12.30 | NS     |
| PluDJC_22850 | Hypothetical protein              | WP_011148680.1 | 16.67 | NS     |
| PluDJC_22855 | Hypothetical protein              | WP_011148681.1 | 14.87 | NS     |
| PluDJC_22860 | Hypothetical protein              | WP_011148682.1 | 7.00  | NS     |
| PluDJC_22865 | Hypothetical protein              | WP_011148683.1 | 4.55  | NS     |
| PluDJC_22870 | Hypothetical protein              | WP_011148684.1 | 3.03  | NS     |
| PluDJC_23645 | DUF4879 domain-containing protein | WP_011148816.1 | -3.22 | -5.26  |
| PluDJC_24500 | Hypothetical protein              | WP_011148929.1 | NS    | 4.35   |
| PluDJC_24590 | Hypothetical protein              | WP_011148944.1 | NS    | -14.41 |

|              |                      |                |       |       |
|--------------|----------------------|----------------|-------|-------|
| PluDJC_24605 | Hypothetical protein | WP_011148947.1 | NS    | -7.21 |
| PluDJC_24610 | Hypothetical protein | WP_011148948.1 | -4.19 | -7.24 |
